# Supplementary material
Source: PubMed Central journal article supplement (PMC3459293)
Supplement: NIHMS374550-supplement-01.pdf [file NIHMS374550-supplement-01.pdf]

Table 1: International Classification of Diseases, 9th Revision, Clinical Modification (ICD-9-CM) Codes Used in the Analysis

| Condition                        | ICD-9-CM Codes                                                                                                                                                                                                                                                                                                                                                                                                                                                                                      |
|----------------------------------|-----------------------------------------------------------------------------------------------------------------------------------------------------------------------------------------------------------------------------------------------------------------------------------------------------------------------------------------------------------------------------------------------------------------------------------------------------------------------------------------------------|
| Age-related macular degeneration | 362.50, 362.51, 362.52, 362.57                                                                                                                                                                                                                                                                                                                                                                                                                                                                      |
| Cataract                         | 366, 366.0, 366.00, 366.01, 366.02, 366.03, 366.04, 366.09, 366.1, 366.10, 366.12, 366.13, 366.14, 366.15, 366.16, 366.17, 366.18, 366.19, 366.41, 366.45                                                                                                                                                                                                                                                                                                                                           |
| Diabetes mellitus                | 250.0, 250.00, 250.01, 250.02, 250.03, 250.1, 250.10, 250.11, 250.12, 250.13, 250.2, 250.20, 250.21, 250.22, 250.23, 250.3, 250.30, 250.31, 250.32, 250.33, 250.4, 250.40, 250.41, 250.42, 250.43, 250.5, 250.50, 250.51, 250.52, 250.53, 250.5, 250.50, 250.51, 250.52, 250.53, 250.6, 250.60, 250.61, 250.62, 250.63, 250.7, 250.70, 250.71, 250.72, 250.73, 250.8, 250.80, 250.81, 250.82, 250.83, 250.9, 250.90, 250.91, 250.92, 250.93, 362.01, 362.02, 362.03, 362.04, 362.05, 362.06, 362.07 |
| Diabetic retinopathy             | 362.01, 362.02, 362.03, 362.04, 362.05, 362.06, 362.07                                                                                                                                                                                                                                                                                                                                                                                                                                              |
| Glaucoma Suspect                 | 365.00, 365.01, 365.04                                                                                                                                                                                                                                                                                                                                                                                                                                                                              |
| Hyperlipidemia                   | 272, 272.0, 272.1, 272.2, 272.3, 272.4, 272.5, 272.6, 272.7, 272.8, 272.9                                                                                                                                                                                                                                                                                                                                                                                                                           |
| Hypertension                     | 401, 401.0, 401.1, 401.9, 405, 405.0, 405.1, 405.01, 405.09, 405.11, 405.19, 405.9, 405.91, 405.99, 362.11, 402, 402.0, 402.00, 402.01, 402.1, 402.10, 402.11, 402.9, 402.90, 402.91, 403, 403.0, 403.00, 403.01, 403.1, 403.10, 403.11, 403.9, 403.90, 403.91, 404.0, 404.00, 404.01, 404.02, 404.03, 404.1, 404.10, 404.11, 404.12, 404.13, 404.9, 404.90, 404.91, 404.92, 404.93                                                                                                                 |
| Migraine                         | 346, 346.0, 346.00, 346.01, 346.1, 346.10, 346.11, 346.2, 346.20, 346.21, 346.8, 346.80, 346.81, 346.9, 346.90, 346.91                                                                                                                                                                                                                                                                                                                                                                              |
| Hypotension                      | 458, 458.0, 458.1, 458.2, 458.21, 458.29, 458.8, 458.9                                                                                                                                                                                                                                                                                                                                                                                                                                              |
| Obesity                          | 278.0, 278.00, 278.01, 278.02                                                                                                                                                                                                                                                                                                                                                                                                                                                                       |
| Open-angle glaucoma              | 365.1, 365.10, 365.11, 365.12, 365.15                                                                                                                                                                                                                                                                                                                                                                                                                                                               |
| Pseudophakia or aphakia          | V43.1, 379.3, 379.31                                                                                                                                                                                                                                                                                                                                                                                                                                                                                |
| Sleep apnea syndrome             | 327.2, 327.20, 327.21, 327.23, 327.27, 327.29, 780.51, 780.53, 780.57                                                                                                                                                                                                                                                                                                                                                                                                                               |
