# Supplementary material
Source: PubMed Central journal article supplement (PMC3459293)
Supplement: NIHMS374550-supplement-02.pdf [file NIHMS374550-supplement-02.pdf]

**Table 4: Relationship Between Statin Use and Open-Angle Glaucoma, Stratified by Age\***

| Age (years) | Non-statin users  |                | Statin users      |                | P-value |
|-------------|-------------------|----------------|-------------------|----------------|---------|
|             | No OAG            | OAG            | No OAG            | OAG            |         |
| 60-69       | 116190<br>(97.4%) | 3141<br>(2.6%) | 185518<br>(97.3%) | 5158<br>(2.7%) | 0.22    |
| 70-79       | 54763<br>(96.0%)  | 2305<br>(4.0%) | 78092<br>(95.9%)  | 3362<br>(4.1%) | 0.41    |
| 80-89       | 13532<br>(96.0%)  | 567<br>(4.0%)  | 17571<br>(96.1%)  | 712<br>(3.9%)  | 0.56    |

\*Table shows the relationship between statin use and development of open-angle glaucoma, stratified by age, without adjustment for potential confounders

OAG = open-angle glaucoma
